1 Full Title: **The Identification of a 1916 Irish Rebel: New Approach for Estimating Relatedness**  
2 **From Low Coverage Homozygous Genomes**

3 Short Title: **Estimating Relatedness From Low Coverage Homozygous Genomes**

4  
5 Daniel Fernandes<sup>1,2\*</sup>, Kendra Sirak<sup>1,3</sup>, Mario Novak<sup>1,4</sup>, John Finarelli<sup>5,6</sup>, John Byrne<sup>7</sup>, Edward Connolly<sup>8</sup>,  
6 Jeanette EL Carlsson<sup>5,9</sup>, Edmondo Ferretti<sup>9</sup>, Ron Pinhasi<sup>1</sup>, Jens Carlsson<sup>5,9</sup>

7  
8 1 School of Archaeology, University College Dublin, Belfield, Dublin 4, Republic of Ireland

9 2 CIAS, Department of Life Sciences, University of Coimbra, 3000-456 Coimbra, Portugal

10 3 Department of Anthropology, Emory University, 201 Dowman Dr., Atlanta, GA 30322, United States of  
11 America

12 4 Institute for Anthropological Research, Ljudevita Gaja 32, 10000 Zagreb, Croatia

13 5 School of Biology and Environment Science, University College Dublin, Belfield, Dublin 4, Republic of  
14 Ireland

15 6 Earth Institute, University College Dublin, Belfield, Dublin 4, Republic of Ireland

16 7 National Forensic Coordination Office, Garda Technical Bureau, Garda Headquarters, Phoenix Park,  
17 Dublin 8, Republic of Ireland.

18 8 Forensic Science Ireland, Garda Headquarters, Phoenix Park, Dublin 8, Republic of Ireland

19 9 Area 52 Research Group, School of Biology and Environment Science, University College Dublin, Belfield,  
20 Dublin 4, Republic of Ireland

21

22 Corresponding author:

23 E-mail: [dani.mag.fernandes@gmail.com](mailto:dani.mag.fernandes@gmail.com) (DF)

24 **ABSTRACT**

25 Thomas Kent was an Irish rebel who was executed by the British forces in the aftermath of the  
26 Rising armed insurrection of 1916 and buried in a shallow grave on Cork prison's grounds. In 2015,  
27 ninety-nine years after his death, a state funeral was offered to his living family to honor his role in  
28 the struggle for Irish independence. However, due to inaccuracies in record keeping, the bodily  
29 remains from Cork prison that supposedly belonged to Kent could not be identified with absolute  
30 certainty. At the request of the Irish National Police (An Garda Síochána), we identified the remains  
31 presumed to be those of Kent using a novel method that compared homozygous single nucleotide  
32 polymorphisms obtained from next-generation shotgun sequencing with genetic data from two of  
33 Kent's known living relatives who share with him a third degree relationship. DNA degradation  
34 resulted in low sequence depth of Thomas Kent's DNA and only a few loci appeared as heterozygous,  
35 rendering traditional methods of relatedness estimation unusable. To remove potential bias, all loci  
36 were therefore analysed as homozygous, leading to a process we refer to as "forced homozygote  
37 approach". This procedure reduces the expected degree of relatedness to half of what is expected  
38 when heterozygotes are included; thus, Kent had a relationship coefficient (Queller and Goodnight's  
39  $R_{xy}$ ) of 12.5% with his third-degree relatives instead of the expected 25%. The results were  
40 confirmed using simulated data for different relatedness classes (2000 simulated individuals per  
41 class), also confirming Thomas Kent's identity. We argue that this method provides a necessary  
42 alternative for relatedness estimations, not only in forensic analysis, but also in ancient DNA studies,  
43 where reduced amounts of genetic information can limit the application of traditional methods.

44

45 **INTRODUCTION**

46 Estimating the genetic relatedness of modern individuals is routinely achieved by employing the use of  
47 microsatellites (synonymous with short tandem repeats (STR)) or other genomic markers that estimate  
48 kinship coefficients based on probabilities of identity-by-descent (IBD) [1,2]. These methods, however,  
49 cannot be applied to cases where the DNA presents high levels of fragmentation and damage, as is  
50 common in ancient DNA (aDNA) research. Upon an organism's death, its genetic material starts to  
51 degrade and accumulate damage as repair enzymes no longer maintain the integrity of the molecular

52 structure of DNA [3,4]. Among the many factors that contribute to the rate and severity of this  
53 phenomenon are temperature, the acidity of the surrounding depositional environment, ambient level of  
54 humidity, and the eventual invasion of environmental microbes into the organism's cells. As a result, DNA  
55 fragments extracted from preserved tissue (in most cases bone and teeth) that is recovered from either  
56 ancient or semi-ancient (e.g. many forensic cases) human remains, are short in length, ranging from 30 to  
57 70 base pairs. The degradation process has a major impact on the success rates and authenticity of many  
58 PCR-based ancient DNA (aDNA) identification techniques [3,4,5,6], however analysis of these short and  
59 damaged DNA molecules was revolutionised with the onset of Next Generation Sequencing (NGS) one  
60 decade ago. Next-Generation shotgun sequencing has enabled aDNA studies to progress at a much faster  
61 rate than before, and when applied in conjunction with optimised bone tissue isolation, DNA extraction,  
62 and sequencing technologies, large amounts of genetic information can be obtained even from samples  
63 with poor molecular preservation.

64 Relatedness estimation is a topic of relevance and interest in both anthropological and forensic studies.  
65 Before NGS, PCR-based studies were affected by a limited capacity to authenticate aDNA results and an  
66 inability to retrieve the required data from most aDNA samples [7,8,9,10]. However, some methods have  
67 been adapted to work specifically with this type of NGS or ancient DNA data; these are present in  
68 software such as PLINK2 [11] and NGSrelate [12]. Both software packages utilise Single Nucleotide  
69 Polymorphism (SNP) data, shown to work well with maximum likelihood approaches, and rely on  
70 genotypes, genotype likelihoods and minor allele frequencies. However, these packages require the input  
71 of relatively high amounts of genetic data (large numbers of loci) which is oftentimes challenging and  
72 expensive to obtain from ancient skeletal material [1,2,12]. Our method overcomes these challenges by  
73 substantially reducing the amount of input data required without sacrificing the confidence of the  
74 relatedness estimation. Here, we apply this novel method to identify the skeletal remains of a famous  
75 Irish Rebel, Thomas Kent.

76 Thomas Kent (1865-1916), an Irish rebel native to Castlelyons, grew up in Bawnard House located just  
77 outside the town of Fermoy in County Cork, Ireland. A week after the Easter Rising insurrection, in April  
78 of 1916, the Royal Irish Constabulary (RIC) raided the family home on 1<sup>st</sup> May. An RIC officer was shot dead  
79 during the raid. Thomas and William Kent were arrested. Following court martial, William was acquitted,

80 but Thomas received a death sentence and was one of 16 men executed by British Forces following the  
81 Easter Rising, being executed in the early hours of the 9<sup>th</sup> of May, 1916 at Cork Detention Barracks and  
82 then buried adjacent to where he fell [13].

83 The remains of Thomas Kent lay in the Barracks, which subsequently became Cork Prison, until June 2015,  
84 when they were exhumed by a team led by the National Monuments Service of the Department of Arts,  
85 Heritage and the Gaeltacht. Poorly kept records from the era of Thomas Kent's execution and throughout  
86 the intervening 99 years resulted in confusion surrounding his final resting place and uncertainty in the  
87 identification of his remains. The presumed identity of the remains was solely based on circumstantial  
88 evidence, and though attempted, it was soon determined that traditional DNA analysis was not an option  
89 due to the expected DNA degradation. The National Forensic Coordination Office at the Garda Technical  
90 Bureau and Forensic Science Ireland contacted the University College Dublin (UCD) who developed a new  
91 DNA identification method, based on optimisation techniques involving the use of the osseous inner ear  
92 part of the petrous part of the temporal bone [14] which has been applied successfully for over ~1000  
93 archaeological samples from temperate regions spanning between 40,000-500 years before present  
94 (average endogenous yields range of 50-70% and with an overall success rate of ~80% [15]).

95 Using low-coverage shotgun sequencing data obtained from a single sequencing run on the Illumina MiSeq  
96 platform, we compared modern genetic data from two of Thomas Kent's living relatives to his century-old  
97 genetic material in order to identify his remains. Based on the success of the our analytic approach, we  
98 propose a NGS shotgun SNP-based method for relatedness estimation that uses "forced homozygote"  
99 allele data to estimate relationship coefficients and is based upon a symmetrical Rxy estimator algorithm  
100 developed by Queller and Goodnight [16].

101 Similar to other available softwares, the approach reported in this study relies on SNP data but requires a  
102 substantially lower amount of input data than the methods mentioned previously while not sacrificing any  
103 accuracy. This makes it widely applicable to the rapidly-expanding field of aDNA studies, where low  
104 coverage homozygous data is the norm, but also for time and budget-efficient forensic applications. Here  
105 we detail the success of our approach in the identification of the historical remains of the Irish  
106 revolutionary Thomas Kent.

107

## 108 RESULTS AND DISCUSSION

### 109 Authentication of Sequencing Data

110 As expected, DNA preservation differed noticeably between the modern individuals and the  
111 archaeological remains of Thomas Kent. The average sequence read length from Thomas Kent (TK) was  
112 predicted to be shorter than his modern relatives (E81 and E82) due to the historic nature of this sample;  
113 average fragment length was determined to be 54.01 base pairs (bp), with a wide standard deviation of  $\pm$   
114 11.57bp (Table 1). In contrast, the modern relatives' DNA size averaged 64.48bp, with a standard  
115 deviation of  $\pm$  1.52bp. It should be noted that the average DNA fragment length is extremely close to the  
116 sequencing length used in the sequencing run (65bp). During the analysis of the raw sequencing data, the  
117 presence of adapters was detected in very few reads for the modern individuals as compared to the  
118 ancient sample (38% for E81 and E82, against 72% for TK), further supporting the notion that these  
119 endogenous DNA fragments were longer than 65bp. This was the expected outcome for modern DNA  
120 samples, indicating that these non-damaged sequences were possibly of lengths greater than or close to  
121 65bp. Due to the archaeological nature of Thomas Kent's genetic material and the possibility of modern  
122 DNA contamination, raw data for this sample was first analysed to confirm the authenticity of the  
123 retrieved DNA as endogenous and ancient. To authenticate the DNA of TK as ancient, we utilised a  
124 widely-used approach developed for ancient DNA that quantifies deamination frequencies at the terminal  
125 ends of the DNA molecule, looking in particular for C>T substitutions at 5' overhangs that characterize the  
126 deamination of cytosines. Using the mapDamage v 2.0 software [17,18], the deamination frequencies  
127 present in TK's DNA, 0.14 C>T at the 5' end and 0.10 G>A at the 3' end (Figure 1) appear consistent with  
128 the expectation of molecular degradation for century-old bones interred in a shallow grave in the  
129 presence of quicklime (Barton 2010). In contrast, the modern DNA from TK's living relatives did not show  
130 significant damage patterns on the ends of the sequences. However, because fragments with shorter size  
131 than that of the sequencing length (65bp) are not expected to be overwhelmingly present in modern DNA,  
132 these deamination frequencies are not informative as it is probable that the ends of the molecules were  
133 not read.

134

135 **Table 1: Sequencing data analysis and relatedness coefficient results**

| Individual               | TK                      | E81                       | E82                       |
|--------------------------|-------------------------|---------------------------|---------------------------|
| Total reads              | 9168617                 | 4817884                   | 6081215                   |
| Trimmed reads            | 6603060                 | 1805684                   | 2335337                   |
| Aligned reads            | 2359538                 | 3855705                   | 4758208                   |
| Endogenous (%)           | 25.73                   | 80.03                     | 78.24                     |
| GC content (%)           | 37                      | 40                        | 40                        |
| Average bp size (stdv)   | 54.01 +- 11.57          | 64.48 +- 1.52             | 64.48 +- 1.45             |
| MapDamage 5'   3'        | 0.14   0.10             | N/A   N/A                 | N/A   N/A                 |
| Molecular sex            | Male                    | Female                    | Female                    |
| Coverage                 | 0.04X                   | 0.08X                     | 0.1X                      |
| SNPs*1                   | 17403                   | 34195                     | 42066                     |
| Common SNPs              | E81-1328 / E82-1592     | TK-1328 / E82-3840        | TK-1592 / E81-3480        |
| mt Haplogroup (score)    | $\alpha 1^{*2}$ (0.77)  | B5 $\gamma 2^{*2}$ (0.61) | B5 $\gamma 2^{*2}$ (0.61) |
| Relatedness coefficients | E81-0.1336 / E82-0.1236 | TK-0.1336 / E82-0.2794    | TK-0.11236 / E81-0.2794   |

\*1 From Haak's 2015 dataset

\*2 Real haplogroup information is not shown due to ethical constraints

136

137

138 **Figure 1: DNA damage patterns from deamination frequencies of terminal bases**

139

140 Mitochondrial haplogroups were also estimated for the three individuals (Table 1) using Phy-Mer [19]. For  
 141 ethical reasons, the determined haplogroup is not reported in this paper; however, the two modern  
 142 relatives, as expected, shared the same haplogroup, with a score of 0.61. This score estimates how well  
 143 the given data matches the assigned haplogroup in the 0-1 interval. Thomas Kent's haplogroup was  
 144 different from that of the relatives, with a score of 0.77. All three haplogroups were consistent with  
 145 expectations for historic or modern individuals native to Ireland.

146

147 **Relatedness Estimations**

148 We estimated relatedness between the three members of the Kent family using very low coverage  
 149 shotgun data (ranging from 0.04X to 0.1X) obtained from one MiSeq sequencing run, which currently  
 150 generates a maximum of 25 million reads. Because we did not use a targeted enrichment or hybridization  
 151 capture method to selectively identify and obtain common loci within the human genome, the output  
 152 data for each individual was a random pool of overlapping reads. Along with the negative controls, these

153 three samples were the only samples placed on the sequencing run. Thomas Kent's DNA accounted for  
154 46% of the run's total reads, with 2359538 of the 9168617 reads aligning to the human genome and  
155 representing a genomic coverage of 0.04X. Relative 1 had 4817884 total reads (24% of the run's total  
156 reads), with 3855705 aligning to the human genome (0.08X coverage) and Relative 2 slightly more,  
157 6081215 total reads (30% of the run's total reads), from which 4758208 were of human origin (0.1X  
158 coverage) (Table 1). None of the negative controls rendered sequences. Using the dataset of SNPs  
159 developed for population and evolutionary genetic studies employed in [10], we called genotypes for  
160 354,212 positions for each individual, obtaining 17403 SNPs called for Thomas Kent, 34195 for Relative 1  
161 (E81), and 42066 for Relative 2 (E82). Out of these, we extracted only the shared SNPs between each  
162 dyad: Thomas Kent:Relative1 (1328 loci), Thomas Kent:Relative2 (1592 loci), and Relative1:Relative2  
163 (3480 loci). As the total genome coverages were very low (Table 1), virtually all SNPs called had only one  
164 1X read depth. Because we did not have more than one read per SNP position, we forced each SNP to be  
165 homozygous by repeating the called base to generate a diploid loci; this is referred to as the "forced  
166 homozygote" approach. For SNPs with more than 1X coverage, one call with phred quality above 30 was  
167 randomly selected and then "forced" homozygous by repeating the base as explained above. We  
168 estimated relationship coefficients for each of the three dyads using the Queller and Goodnight (1989)  
169 algorithm incorporated in the software SPAGeDi1-5a (build04-03-2015) [20], using the correspondent  
170 European allele frequencies downloaded from the 1000 Genomes website. As expected, the use of the  
171 forced homozygote approach resulted in relatedness coefficients ( $R_{xy}$ ) of half the expected values. For  
172 the pair Relative1:Relative2, we observed an  $R_{xy}$  of 0.2794, consistent in modern genetics with  
173 third-degree relatedness, but with second-degree relatedness in the forced homozygote approach (i.e.  
174 equivalent to a modern genetics  $R_{xy}$  of 0.50). For Thomas Kent:Relative1, the  $R_{xy}$  was estimated at  
175 0.1336, and for Thomas Kent:Relative2, it was estimated at 0.1236. These values are consistent with a  
176 third degree of relatedness for uncle/niece (25% in modern genetics, or 12.5% under our forced  
177 homozygote approach) between Thomas Kent and the two living relatives, supporting the positive  
178 identification of his remains.

179 The expected hypothesis that Thomas Kent was related to the two living relatives by a third-degree  
180 relationship and the two living relatives are related to each other by a second-degree relationship

181 (Hypothesis #4, Table 2) is unambiguously supported by the data, comprising nearly the entire posterior  
 182 probability of the set of hypotheses. Using the posterior probabilities, the odds that this hypothesis is  
 183 incorrect given the observed data is less than one in one million (8.15 E-07). Indeed, the Odds Ratio of the  
 184 summed posterior probabilities for the four hypotheses proposing that the remains of Thomas Kent are  
 185 related, in any manner, to both relatives versus the odds that he is unrelated to at least one of the two is  
 186 in excess of 5 trillion, indicating conclusively that the remains found are related to the two living  
 187 individuals.

188

189 **Table 2: Set of potential relatedness hypotheses for the combinations of full sibling/parental and**  
 190 **half sibling/uncle between the three subjects**

| <b>Hypothesis #</b> | <b>TK - E81</b> | <b>TK - E82</b> | <b>E81 - E82</b> | <b>Model LnL</b> | <b>Posterior Probability</b> |
|---------------------|-----------------|-----------------|------------------|------------------|------------------------------|
| <b>1</b>            | Unrelated       | Unrelated       | Unrelated        | -99.3158         | 4.6096 E-48                  |
| <b>2</b>            | Unrelated       | Unrelated       | Full Sibling     | -5.58593         | 2.3444 E-07                  |
| <b>3</b>            | Unrelated       | Unrelated       | Half Sibling     | -32.6766         | 4.0244 E-19                  |
| <b>4</b>            | Uncle           | Uncle           | Full Sibling     | 9.680128         | 0.9999                       |
| <b>5</b>            | Parent          | Parent          | Full Sibling     | -4.6796          | 5.8030 E-07                  |
| <b>6</b>            | Parent          | Uncle           | Half Sibling     | -23.3091         | 4.7092 E-15                  |
| <b>7</b>            | Uncle           | Parent          | Half Sibling     | -25.8717         | 3.6312 E-16                  |
| <b>8</b>            | Parent          | Unrelated       | Unrelated        | -97.7177         | 2.2789 E-47                  |
| <b>9</b>            | Uncle           | Unrelated       | Unrelated        | -91.8191         | 8.3072 E-45                  |
| <b>10</b>           | Unrelated       | Parent          | Unrelated        | -100.008         | 2.3079 E-48                  |
| <b>11</b>           | Unrelated       | Uncle           | Unrelated        | -91.5465         | 1.0910 E-44                  |

191

192

### 193 **CyBRSex Package**

194 In order to assess the accuracy of the relatedness estimations using forced homozygote data, we  
 195 computed simulations on three relatedness classes - unrelated individuals, full siblings, and half siblings.  
 196 We randomly generated SNP data for a total of 2000 virtual pairs of individuals using allele frequencies of  
 197 the shared SNPs of each of the three possible dyads - Thomas Kent:Relative1, Thomas Kent:Relative2,  
 198 Relative1:Relative2. For each of these combinations, 2000 unrelated individuals, 2000 full siblings, and  
 199 2000 half siblings were simulated, their relatedness coefficients calculated in SPAGeDI, and the



200 distribution visualised, as shown in Figure 2. The peaks of the curves are at the expected half-values of  
201 the relationship coefficients and it is clear that the results obtained for the three relative pairs fall within  
202 the expected ranges of variation.

203

204 **Figure 2: Relatedness coefficients' distribution for virtual dyads.**

205 “Forced homozygote” relatedness coefficients of computer generated individuals calculated using  
206 SPAGeDI1-5a, based on minor allele frequencies of the SNPs common to the pairs TK-E81, TK-E82,  
207 E81-E82. Orange-Unrelated, Green-Half Siblings, Blue-Full Siblings. Arrows indicate the halved “forced  
208 homozygote” relatedness coefficients found for each pair.

209

210 An R package (CyBRSex) was developed to automate the two processes: simulations down to a true  
211 coefficient of relationship of 25%, and actual data tests. By using data in PLINK format as input, our  
212 package either runs SPAGeDI for the desired pairs of individuals, or generates X number of homozygous  
213 individuals for the given set of SNPs and their allele frequencies. It is then possible to visualise the  
214 distribution of simulated relatedness estimates for any given relatedness class with the expected ranges  
215 of variation from the specific input SNP data. The tests on pairs of individuals are performed by a function  
216 that requires two input files and an allele frequency file. Each of the three coefficients of relationship  
217 used for simulations (0%, 25% and 50%) have a pair of functions that generate the simulated individuals  
218 and then separately plots them as an histogram. One extra function retrieves the alleles used for a  
219 specific SPAGeDI test, and fits their frequencies to the required format for the virtual simulations.  
220 This package can be found at <https://github.com/danimag/tkrelated>.

221

222 **CONCLUSIONS**

223 A unique interdisciplinary research opportunity on this historical matter has allowed us to develop an  
224 efficient and accurate method for relatedness estimations using small amounts of genetic data. We were  
225 able to identify the skeletal remains of Thomas Kent, whose state funeral took place on the 18<sup>th</sup> of  
226 September of 2015, shortly after the identification of his remains. Applicable to both forensic and aDNA  
227 research, our method for relatedness estimations has important additional benefits when compared to

228 existing methods. When compared to the software packages PLINK and NGSrelate, the approach we  
229 present here requires substantially lower genomic coverage, which will prove helpful when large amounts  
230 of genomic data are unavailable. In a situation similar to ours, Korneliussen and Moltke [12], show that  
231 using the software NGSrelate to estimate relatedness based on a coverage of 1X results in large variance  
232 of relatedness estimates, yet it still performs better than PLINK. As we have shown, our method was  
233 effective with coverages ranging from 0.04X to 0.1X, an order of magnitude reduction on the amount of  
234 genetic data required. We also have designed an R package (CybRsex) to simulate virtual groups of  
235 (un)related individuals and their relatedness coefficients, based on Queller and Goodnight's  $R_{xy}$ , from a  
236 given set of SNPs and corresponding allele frequencies. This should prove useful not only in routine  
237 forensic analysis but also in ancient DNA studies, where low endogenous DNA contents are often the norm.  
238 With the implementation of the “forced homozygote” method, estimating the relatedness between  
239 individuals in contexts such as multiple or mass burials may become a more routine task in future studies.  
240 This will benefit research in archaeology and anthropology, where the relationships of individuals found  
241 interred in multiple burials are often only hypothesized. In addition, we see broad applications of this  
242 new approach to forensic sciences, often tasked with identifying individuals interred in mass graves or  
243 with unknown but presumed identities.

244

## 245 **MATERIALS AND METHODS**

### 246 **Archaeological Bone Sampling**

247 To obtain genetic material from the skeletal remains of Thomas Kent, fine bone powder was retrieved  
248 from the cochlea of the left petrous part of the temporal bone that was detached from the rest of the  
249 cranium. While the petrous part of the temporal bone is accepted as yielding systematically higher  
250 endogenous DNA compared to other skeletal elements [21], the cochlea in particular was chosen because  
251 of research that demonstrated that the otic capsule, and particularly the cochlea, provides the highest  
252 endogenous DNA yield from any part of the petrous [14]. The powder was obtained using a  
253 minimally-destructive direct drilling technique developed at University College Dublin aimed at reducing  
254 any possible damage to the bone. A Dremel 9100 Fortiflex rotary tool, fitted with a small-sized spherical  
255 grinding bit (1.5mm) previously treated with bleach and ethanol, was set to medium speed and used to

256 obtain approximately 100mg of bone powder. The cochlea was accessed from the superior aspect of the  
257 petrous bone, limiting visible damage to a 2-3mm hole on the superior surface of the petrous. The bone  
258 powder generated from drilling the cochlear cavern was collected in a clean weighing boat and  
259 transferred to a 1.5mL sterile Eppendorf tube. This procedure was conducted in a clean sample  
260 preparation facility at UCD.

261

### 262 **Blood Sampling and DNA Extraction for Modern Relatives**

263 Blood samples were collected from Thomas Kent's living relatives in accordance with the prescribed  
264 methods employed by Forensic Science Ireland in the investigation of any unidentified remains. DNA  
265 extracts were then sent to University College Dublin for further processing. Informed consent was  
266 obtained by the Gardaí for the genetic analysis of this biological material.

267

### 268 **DNA Extraction for Thomas Kent**

269 DNA was extracted from Thomas Kent's bone powder following the protocol from [22] which improves  
270 upon the optimized silica-based extraction technique described in [6]. Extraction took place in a  
271 physically separated ancient DNA lab at UCD in adherence with stringent anti-contamination protocols.  
272 Approximately 50mg of bone powder was combined with 1mL of an extraction buffer solution containing  
273 0.5M EDTA and Proteinase K (Roche Diagnostics). The bone powder was suspended by vortexing and  
274 incubated at 37°C with rotation for 18 hours in a ThermoMixer C (Eppendorf AG) and subsequently  
275 centrifuged for 2 minutes at 17,000 g in a Heraeus Pico 17 microcentrifuge (Thermo Scientific) to  
276 separate the undissolved bone from the supernatant solution. The supernatant solution was collected  
277 and added to 13mL of binding buffer solution containing guanidine hydrochloride (MW 95.53, 5M),  
278 isopropanol, Tween-20 (10%), and sodium acetate (3M) in a custom-made binding apparatus. This binding  
279 apparatus was constructed by forcibly fitting a reservoir removed from a Zymo-Spin V column (Zymo  
280 Research) into a MinElute silica spin column (Qiagen). This apparatus was then placed into a 50mL falcon  
281 tube [22]. The 14mL solution of binding buffer and DNA extract was added to the extension reservoir in  
282 the falcon tube, the cap was secured, and the falcon tube was centrifuged for 4 minutes at 2500rpm,  
283 rotated 90°, and centrifuged for another 2 minutes at 3,000rpm. The extension reservoir was then

284 disassembled and the MinElute column was placed into a 2mL collection tube. The column was dry-spun  
285 for 1 minute at 13,300rpm, and two wash steps were subsequently performed using 650µL of PE wash  
286 buffer. Finally, the column was placed into a clean 1.5mL Eppendorf tube and the DNA was eluted into  
287 25µL of TET buffer.

288

### 289 **DNA Library Preparation**

290 Libraries for next-generation sequencing were built for all three DNA extracts using a modified version of  
291 [23] as outlined in [21], where blunt end repair was performed using NEBNext End-Repair (New England  
292 Biolabs Inc.) and Bst was inactivated by heat (20 minutes at 80 °C). Thomas Kent's DNA library was  
293 prepared in a dedicated ancient DNA lab whereas the libraries for the DNA of two modern relatives were  
294 prepared in a modern DNA lab in UCD Earth Institute's Area 52. Indexing PCRs were performed with  
295 AccuPrime Pfx Supermix (Life Technology), with primer IS4 and an indexing primer. 3µL of the indexed  
296 library was added to 21µL of freshly prepared PCR mix, and combined with 1µL of unique index, enabling  
297 the pooling of samples for multiplex sequencing. This resulted in a final volume of 25µL. PCR  
298 amplification was performed using the following temperature cycling profile: 5 minutes at 95 °C, 12  
299 cycles of 15 sec at 95 °C, 30 sec at 60 °C, and 30 sec at 68 °C, and a final period of 5 minutes at 68 °C. PCR  
300 reactions were then purified using MinElute PCR Purification Kit (Qiagen), following the manufacturer's  
301 instructions. Assessment of the PCR reactions were performed on the Agilent 2100 Bioanalyzer following  
302 the guidelines of the manufacturer. Based on the concentrations indicated by the Bioanalyzer, samples  
303 were pooled in equimolar ratios for sequencing.

304

### 305 **Next-Generation Sequencing**

306 Libraries were sequenced on an Illumina MiSeq platform at the UCD Conway Institute of Biomolecular and  
307 Biomedical Research using 65 base pair (bp) single-end sequencing.

308

### 309 **Bioinformatics Analysis**

310 A custom ancient DNA bioinformatics pipeline written by the Pinhasi Lab was applied for processing of  
311 raw MiSeq data. The software cutadapt v1.5 [24] was used to trim adapter sequences. Minimum overlap

312 was set to 1 (-O 1) and minimum length to 17bp (-m 17). Alignment to the human reference genome  
313 (hg19, GRCh37) was processed by the Burrows-Wheeler Aligner [25] with disabled seed (-l 1000) and  
314 filtering for reads with a minimum quality QC score of 30. Duplicated sequences were removed using  
315 samtools v0.1.19-96b5f2294a [26]. To assess the authenticity of Thomas Kent's DNA as ancient, damage  
316 patterns were assessed using the mapDamage tool [18].  
317 Single nucleotide polymorphisms were called using the Genome Analyzer Tool Kit's (GATK) Pileup tool for  
318 the 354,212 positions present in the Harvard's "Fully public genotype dataset" described in [10].

319

### 320 **Relatedness Analysis**

321 Most loci were represented by 1X reads, and this low read depth prevented identification of  
322 heterozygote loci for the vast majority of SNP loci in all three analysed individuals, although some loci  
323 had greater coverage. To be able to fully leverage the set of SNP loci, we modeled relatedness on a  
324 sample of single-read loci. For loci with greater read depth, we randomly selected one representative  
325 allele to reduce the bias that might have been introduced by allowing for some heterozygote loci. Thus,  
326 by ensuring that all loci contained only one allele we forced a "homozygote" structure on the data. We  
327 reduced the list of genotyped loci to only those loci shared for each dyad (i.e., Thomas Kent and  
328 Relative1, Thomas Kent and Relative2, Relative1 and 2). European allele frequencies at the shared loci  
329 for each comparison were retrieved from the 1000 genomes project (release 20100804  
330 <http://www.1000genomes.org/>) using tabix (<http://www.htslib.org/doc/tabix.html>), and these were  
331 used as the reference frequencies for estimating degree of relatedness (symmetrical Rxy estimator,  
332 Queller and Goodnight 1989) using SPAGeDi1-5a (build04-03-2015) [20]. Forcing homozygosity on the  
333 data will necessarily impact the Queller & Goodnight coefficient, as only half the genome is being  
334 interrogated. This will reduce the anticipated relatedness between dyads by a factor of one-half (i.e.,  
335 reducing full sibling/parent-offspring relationships from 0.5 to 0.25 and between niece or nephew-uncle  
336 or aunt/half sibling/grandchild-grandparent relationships from 0.25 to 0.125).

337

338 For the three dyads of relatedness comparison (Thomas Kent and Relative1, Thomas Kent and Relative2,  
339 Relative1 and 2), we simulated nine data sets, each with 2000 virtual pairs of full siblings, half siblings or

340 unrelated individuals, using the observed alleles held in common for the each of the comparisons and the  
341 correspondent European allele frequencies (release 20100804 <http://www.1000genomes.org/>). For each  
342 simulated data set, we forced the same homozygote condition, resulting in a comparable set of loci  
343 represented by one allele. We assessed the degree of relatedness for the simulated data sets with  
344 SPAGeDi1-5a. The output relatedness coefficient for each simulated data set was tabulated to create an  
345 empirical distribution for three degrees of relatedness (full sibling/parent, half sibling/uncle, unrelated)  
346 for the particular set of loci observed to be held in common for the three subjects.

347  
348 The distribution of relatedness coefficients was nearly normal (Figure 2). Using mean and variance  
349 parameters fit to the empirical distributions, we calculated maximum likelihood (ML) fits of the observed  
350 degree of relatedness for each dyad to the three relatedness distributions. Potential relatedness  
351 hypotheses constitute the set of potential combinations of full sibling/parental and half sibling/uncle  
352 between the three subjects, producing a set of eleven potential hypotheses (Table 2). The ML fit of each  
353 hypothesis is then the sum of the ML fits of the observed relatedness coefficient between the two  
354 individuals for the appropriate empirical distribution.

355

### 356 **Ethics Statement**

357 The investigation into the authentication of Thomas Kent's remains was tasked to the Irish Police, An  
358 Garda Siochana, on behalf of the State, and therefore obeyed to specific ethical and legal  
359 considerations.

360 Informed consent was obtained when collecting the blood from Thomas Kent's living relatives in regard to  
361 analysis of the genetic data and dissemination of the results. Kent's remains, legally considered  
362 archaeological, were handled with the permission of the correspondent legal authorities  
363 The request for assistance from UCD, by An Garda Siochana, to identify the remains recovered from Cork  
364 Prison in early 2015 was made to progress that element of the overall investigation.

365 An Garda Siochana are tasked with such investigations, on behalf of the State, and do not require an  
366 ethics committee to initiate enquiries. An Garda Siochana may enlist the expertise of any agency or  
367 academic entity to pursue lines of enquiry and such was the case with UCD.

368 In this case, the original request for help in identifying the remains came from the Department of An  
369 Taoiseach (Head of Government) to the National Forensic Coordination Office, who then managed the  
370 overall investigation. The integrity of all evidence, samples and results was managed by the Head of the  
371 National Forensic Coordination Office, who was also the investigating officer in this case. All ethical  
372 considerations and legal obligations under the Data Protection Acts were his responsibility as  
373 Investigating Officer, and he was the person who sought the assistance of UCD on behalf of An Garda  
374 Siochana. He reviewed all evidence or results before they were communicated to the relevant parties. In  
375 such investigations ethical considerations form part of the overall review, in addition to many layers of  
376 legal consideration and all requirements were met.

377

### 378 **ACKNOWLEDGEMENTS**

379 We would like to thank Dr. Sudipto Das for his comments on sequencing methods; the Irish Government  
380 for their support throughout the Thomas Kent identification process; and Dr. Olivia Cheronet for helping  
381 with the “CybRsex” R package.

382

### 383 **REFERENCES**

- 384 1. Powell JE, Visscher PM, Goddard ME. Reconciling the analysis of IBD and IBS in complex trait  
385 studies. *Nat Rev Genet.* 2010;11(11):800-5.
- 386 2. Speed D, Balding DJ. Relatedness in the post-genomic era: is it still useful? *Nat Rev Genet.*  
387 2015;16(1):33-44.
- 388 3. Pääbo S. Ancient DNA: extraction, characterization, molecular cloning, and enzymatic  
389 amplification. *Proceedings of the National Academy of Sciences.* 1989;86(6):1939-43.
- 390 4. Mitchell D, Willerslev E, Hansen A. Damage and repair of ancient DNA. *Mutation*  
391 *Research/Fundamental and Molecular Mechanisms of Mutagenesis.* 2005;571(1-2):265-76.
- 392 5. Willerslev E, Hansen AJ, Rnn R, Brand TB, Barnes I, Wiuf C, et al. Long-term persistence of  
393 bacterial DNA. *Current Biology.* 2004;14(1):R9-R10.

- 394 6. Rohland N, Hofreiter M. Ancient DNA extraction from bones and teeth. *Nat Protocols*.  
395 2007;2(7):1756-62.
- 396 7. Baca M, Doan K, Sobczyk M, Stankovic A, Węgleński P. Ancient DNA reveals kinship burial patterns  
397 of a pre-Columbian Andean community. *BMC Genetics*. 2012;13(1):1-11.
- 398 8. Deguilloux MF, Pemonge MH, Mendisco F, Thibon D, Cartron I, Castex D. Ancient DNA and kinship  
399 analysis of human remains deposited in Merovingian necropolis sarcophagi (Jau Dignac et Loirac,  
400 France, 7th-8th century AD). *Journal of Archaeological Science*. 2014;41:399-405.
- 401 9. Dudar JC, Wayne JS, Saunders SR. Determination of a kinship system using ancient DNA, mortuary  
402 practice, and historic records in an upper Canadian pioneer cemetery. *International Journal of*  
403 *Osteoarchaeology*. 2003;13(4):232-46.
- 404 10. Haak W, Lazaridis I, Patterson N, Rohland N, Mallick S, Llamas B, et al. Massive migration from the  
405 steppe was a source for Indo-European languages in Europe. *Nature*. 2015;522(7555):207-11.
- 406 11. Chang CC, Chow CC, Tellier LC, Vattikuti S, Purcell SM, Lee JJ. Second-generation PLINK: rising to  
407 the challenge of larger and richer datasets. *GigaScience*. 2015;4(1):1-16.
- 408 12. Korneliussen TS, Moltke I. NgsRelate: a software tool for estimating pairwise relatedness from  
409 next-generation sequencing data. *Bioinformatics*. 2015;31(24):4009-11.
- 410 13. Barton B. *The Secret Court Martial Records of the Easter Rising*. Dublin: The History Press Ireland;  
411 2010.
- 412 14. Pinhasi R, Fernandes D, Sirak K, Novak M, Connell S, Alpaslan-Roodenberg S, et al. Optimal Ancient  
413 DNA Yields from the Inner Ear Part of the Human Petrous Bone. *PloS one*. 2015;10(6):e0129102.
- 414 15. Mathieson I, Lazaridis I, Rohland N, Mallick S, Patterson N, Roodenberg SA, et al. Genome-wide  
415 patterns of selection in 230 ancient Eurasians. *Nature*. 2015;528(7583):499-503.
- 416 16. Queller DC, Goodnight KF. Estimating relatedness using genetic markers. *Evolution*.  
417 1989;43:258-75.



- 418 17. Ginolhac A, Rasmussen M, Gilbert MTP, Willerslev E, Orlando L. mapDamage: testing for damage  
419 patterns in ancient DNA sequences. *Bioinformatics*. 2011;27(15):2153-5.
- 420 18. Jansson H, Ginolhac A, Schubert M, Johnson PLF, Orlando L. mapDamage2.0: fast approximate  
421 Bayesian estimates of ancient DNA damage parameters. *Bioinformatics*. 2013;29(13):1682-4.
- 422 19. Navarro-Gomez D, Leipzig J, Shen L, Lott M, Stassen APM, Wallace DC, et al. Phy-Mer: a novel  
423 alignment-free and reference-independent mitochondrial haplogroup classifier. *Bioinformatics*.  
424 2015;31(8):1310-2.
- 425 20. Hardy OJ, Vekemans X. spagedi: a versatile computer program to analyse spatial genetic structure  
426 at the individual or population levels. *Molecular Ecology Notes*. 2002;2(4):618-20.
- 427 21. Gamba C, Jones ER, Teasdale MD, McLaughlin RL, Gonzalez-Fortes G, Mattiangeli V, et al. Genome  
428 flux and stasis in a five millennium transect of European prehistory. *Nature communications*.  
429 2014;5:5257.
- 430 22. Dabney J, Knapp M, Glocke I, Gansauge M-T, Weihmann A, Nickel B, et al. Complete mitochondrial  
431 genome sequence of a Middle Pleistocene cave bear reconstructed from ultrashort DNA fragments.  
432 *Proceedings of the National Academy of Sciences*. 2013;110(39):15758-63.
- 433 23. Meyer M, Kircher M. Illumina sequencing library preparation for highly multiplexed target capture  
434 and sequencing. *Cold Spring Harbor protocols*. 2010;2010(6):pdb prot5448.
- 435 24. Martin M. Cutadapt removes adapter sequences from high-throughput sequencing reads. 2011.  
436 2011;17(1).
- 437 25. Li H, Durbin R. Fast and accurate short read alignment with Burrows-Wheeler transform.  
438 *Bioinformatics*. 2009;25(14):1754-60.
- 439 26. Li H, Handsaker B, Wysoker A, Fennell T, Ruan J, Homer N, et al. The Sequence Alignment/Map  
440 format and SAMtools. *Bioinformatics*. 2009;25(16):2078-9.

441

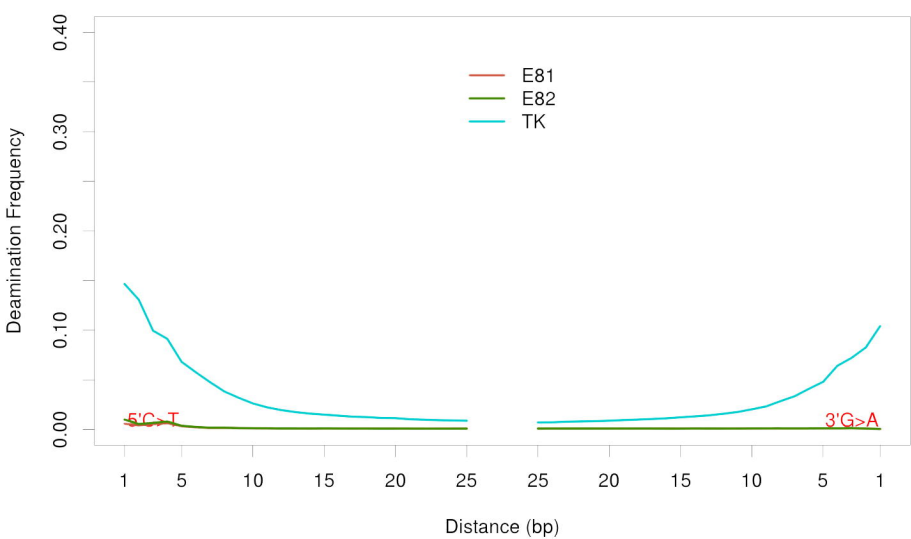

Relatedness coefficients for TK-E81

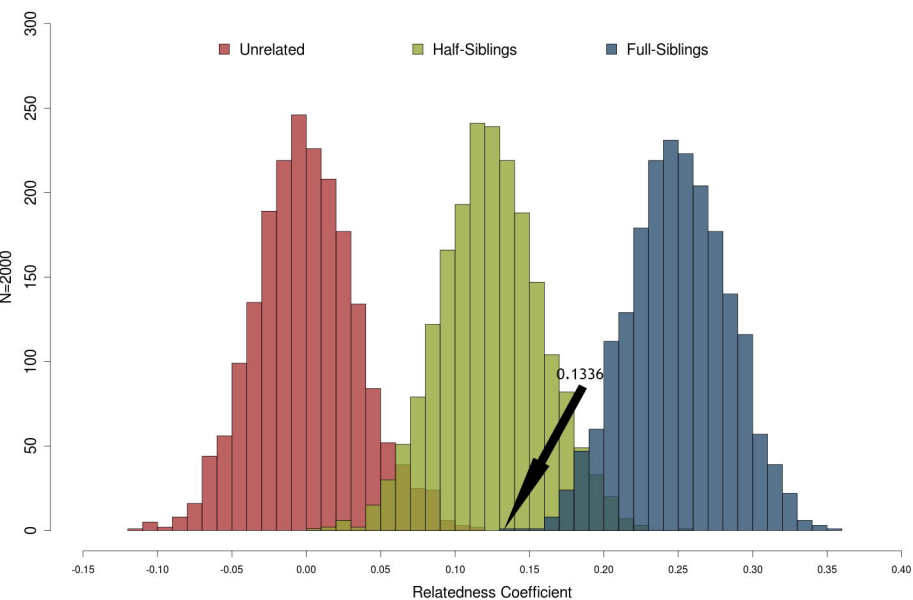

Relatedness coefficients for TK-E82

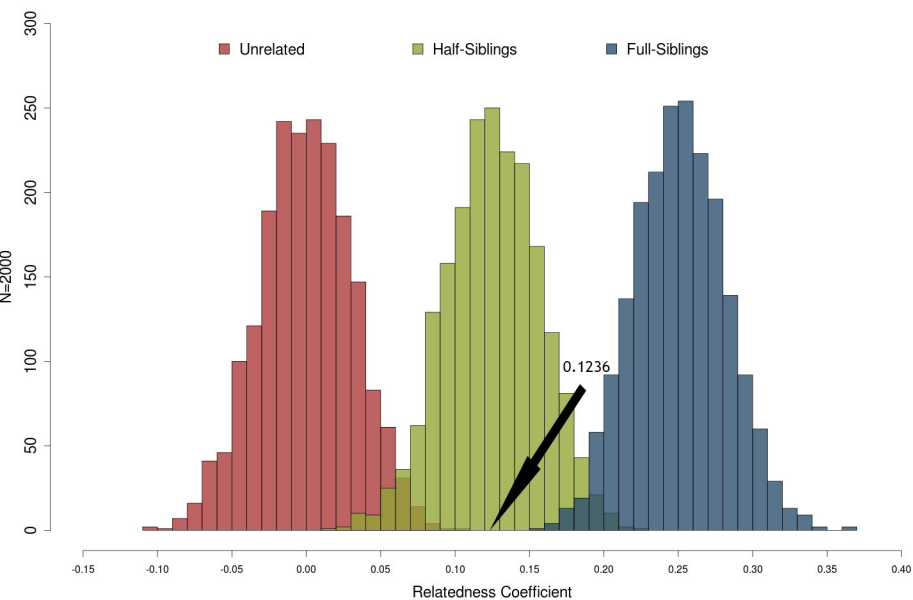

Relatedness coefficients for E81-E82

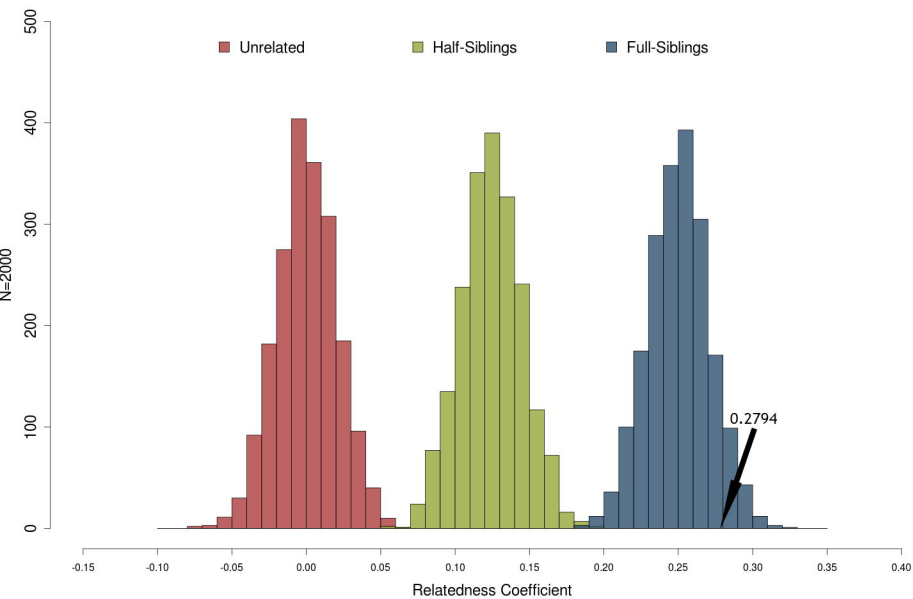

Source: http://biorxiv.org/content/10.1101/076992v1.full.pdf
